# Supplementary material for: The SKP2‐p27 axis defines susceptibility to cell death upon CHK1 inhibition
Source: PubMed Central journal article supplement (PMC9348596; doi:10.1002/1878-0261.13264), 2022-07-07

**A**

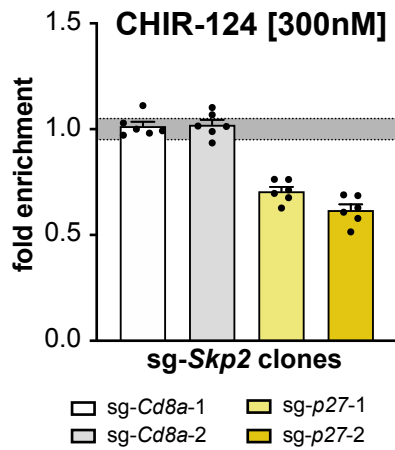

**B**

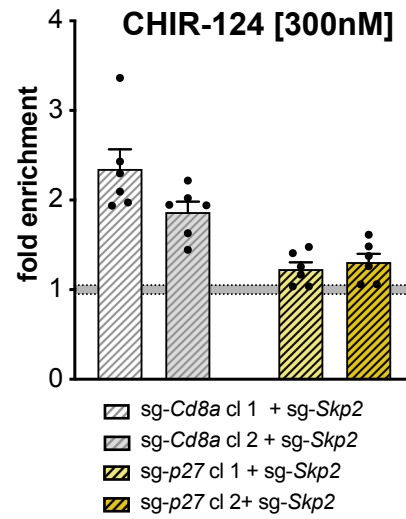

**C**

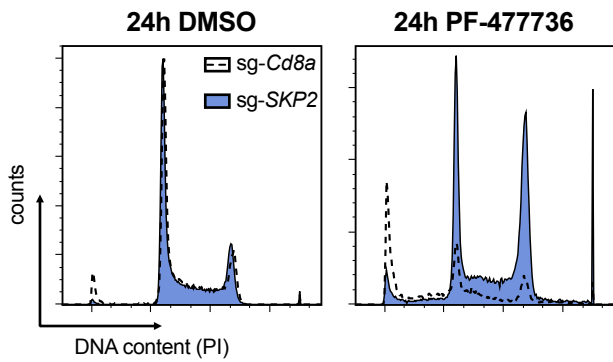

**D**

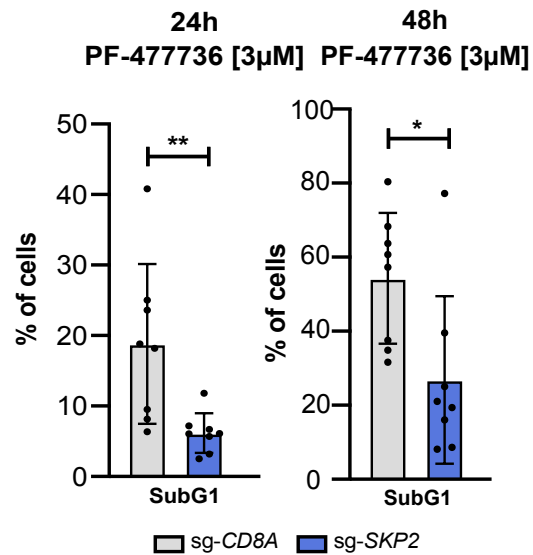

**E**

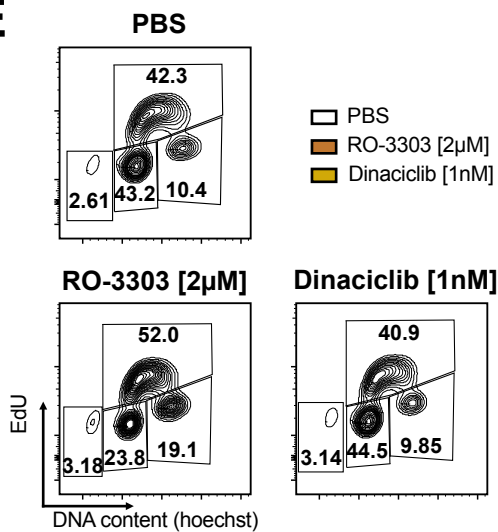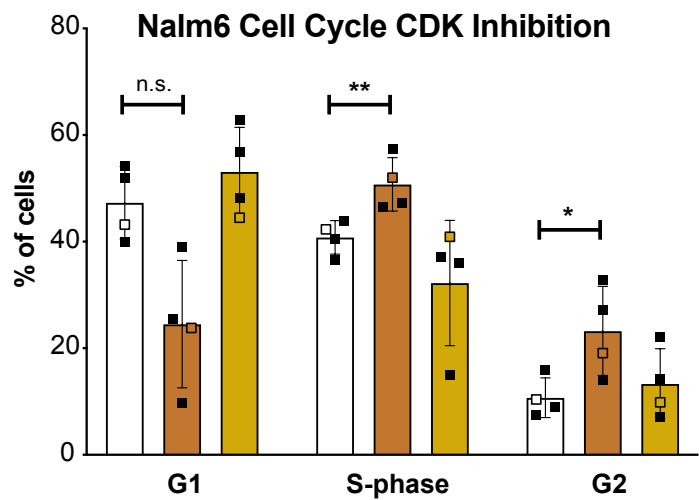

Supplement: MOL2-16-2771-s003.pdf [file MOL2-16-2771-s003.pdf]
